# Supplementary material for: A Mutation in DNA Polymerase α Rescues WEE1KO Sensitivity to HU
Source: MDPI journal article supplement (doi:10.3390/ijms22179409), 2021-08-30
Supplement: s1 [file s1]

## Supplementary Materials:

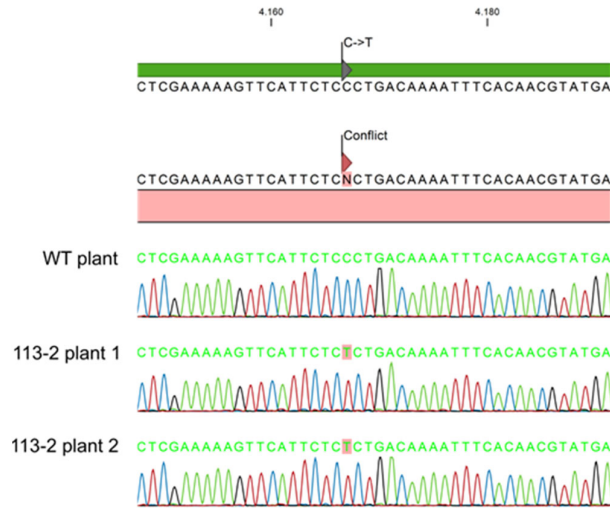

**Figure S1.** Confirmation of mutation in line 113-2 by Sanger sequencing.

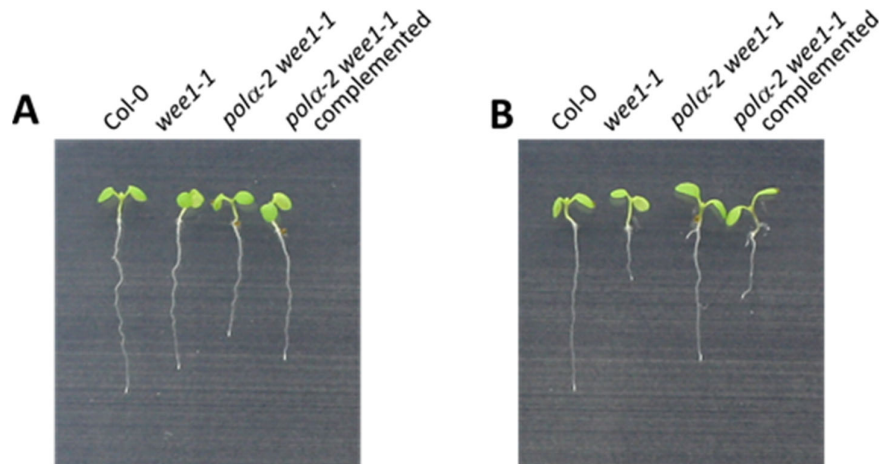

**Figure S2. A complementation construct restores HU-sensitivity to *pola-2 wee1-1* plants.** Root growth of 7-day-old wild-type (Col-0), *wee1-1* and *pola-2 wee1-1* seedlings, together with *pola-2 wee1-1* seedlings transformed with the complementation construct, grown on control medium (A) or medium supplemented with 0.75 mM HU (B).

## Supplemental table S1

|                     |                              |
|---------------------|------------------------------|
| wee1-1_genotype_FW  | TCAATAAGGCTTGTTTCTTCAGT      |
| wee1-1_genotype_REV | CCCTACGAACAAAACAAGATAAAAAAC  |
| wee1-1_TDNA_REV     | ATAATAACGCTGCGGACATCTACATTTT |
| atm-2_genotype_FW   | GGTTGGGCAGTTCCAAAGATGA       |
| atm-2_genotype_REV  | TCTCTCCTTGTTTCAAGCTCTG       |
| atr-2_genotype_FW   | CAAGGGTTCCGATGTTCAAAGTG      |
| atr-2_genotype_REV  | CAATCAGCAGGAAAAGACAAATC      |
| SALK_TDNA_FW        | ATTTTGCCGATTTTCGGAAC         |
| sog1-1_genotype_FW  | CGATCATGGCTGATCGATAG         |
| sog1-1_genotype_REV | TCGGCAAGAGAAACCTCATG         |
| pola-2_genotype_FW  | TCACTCTCCAGCTTACTAACA        |
| pola-2_genotype_REV | GTAGGCTGGACCTTTTTTTTGT       |
| EMB2386_qRT_FW      | CTCTCGTTCCAGAGCTCGCAAAA      |

---

|                 |                           |
|-----------------|---------------------------|
| EMB2386_qRT_REV | AAGAACACGCATCCTACGCATCC   |
| PAC1_qRT_FW     | TCTCTTTGCAGGATGGGACAAGC   |
| PAC1_qRT_REV    | AGACTGAGCCGCCTGATTGTTTG   |
| RPS26C_qRT_FW   | GACTTTCAAGCGCAGGAATGGTG   |
| RPS26C_qRT_REV  | CCTTGTCCTTGGGGCAACACTTT   |
| BRCA1_qRT_FW    | TGTTCCCTCTTTCAGCGATTTGATG |
| BRCA1_qRT_REV   | GGCCTCTGAGTCCATTCAAACA    |
| PARP2_qRT_FW    | ATGGCGTTCTGCTCCTCTGC      |
| PARP2_qRT_REV   | GGTGCTGTTTTCCCCACACC      |
| RAD17_qRT_FW    | TGTGCACAACACTAGTTCAGGAC   |
| RAD17_qRT_REV   | AACAACGGGGCGCCTTTATTCC    |
| RAD51_qRT_FW    | TTCCGCTCTGGAAAGACTCAGC    |
| RAD51_qRT_REV   | ACCTCCTTGATCCATGGGAAGTTG  |
| SMR4_qRT_FW     | GCCGAGAAGCACGATGTATAG     |
| SMR4_qRT_REV    | AGATCTGGTGGCTGAAAGTACC    |
| SMR5_qRT_FW     | AAACTACGACGACGGAGATACG    |
| SMR5_qRT_REV    | GCTACCACCGAGAAGAACAAGT    |
| SMR7_qRT_FW     | TTCATAAAGCCGGTGAAGACG     |
| SMR7_qRT_REV    | CGCCGTGGGAGTGATACAAATTC   |
| TSO2_qRT_FW     | TGTCCGATGTTCAAGTCTCTGAG   |
| TSO2_qRT_REV    | CTCCGAGTGGATGTTTTCAATCG   |
| AP3_qRT_FW      | CCCTAACACCACAACGAAGGAGAT  |
| AP3_qRT_REV     | GTTTCCTCTTGTTTCTTGCAATTC  |
| SEP3_qRT_FW     | TTAGCAGTTGAACTTAGTAGCCA   |
| SEP3_qRT_REV    | CCAAGATCTTCTCCCAACAGAT    |
| FT_qRT_FW       | GAACAACCTTTGGCAATGAGATT   |
| FT_qRT_REV      | CACCCTGGTGCATACACTGTT     |

---
